# Supplementary material for: Effects of Nursery Substrates Added with Horticultural Mediums on Growth Qualities of Plug Seedlings and Consolidation Capacities of Root Lumps
Source: Preprints.org preprint supplement (doi:10.20944/preprints202203.0351.v1), 2022-03-25
Supplement: Supplementary file 1 [file supplementary]

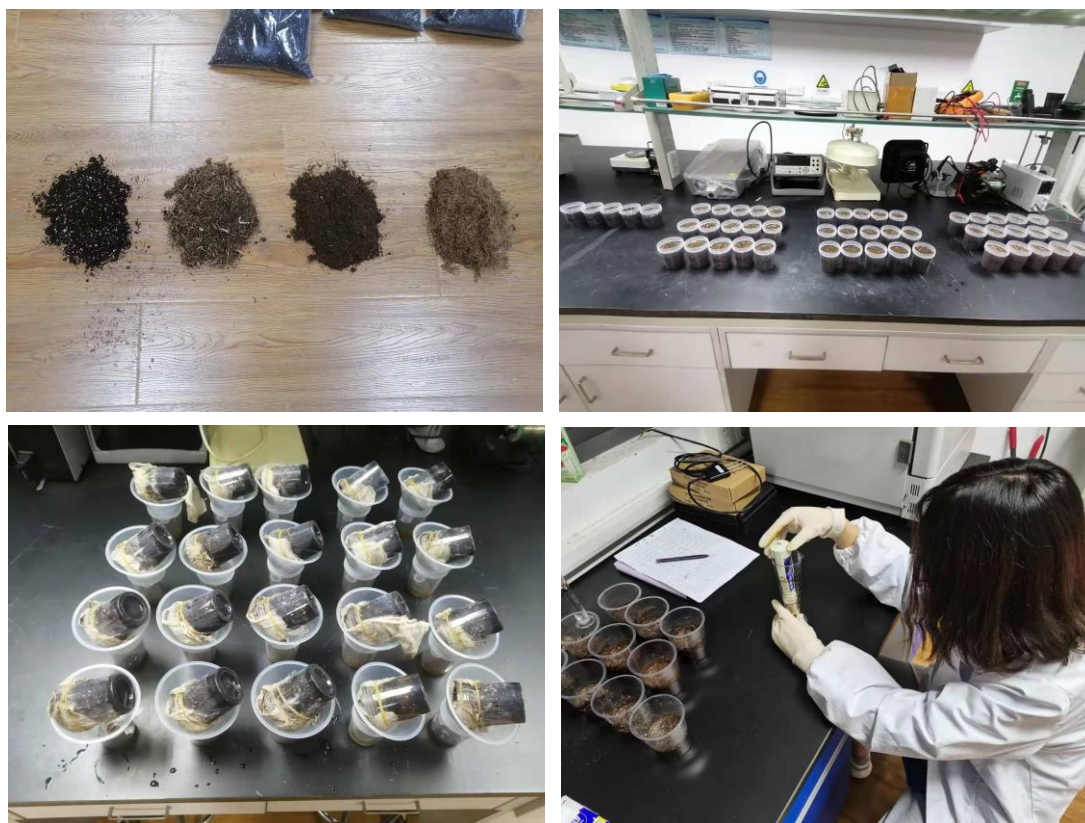

**Figure S1. Compound substrate treatments and testing for their physicochemical properties**

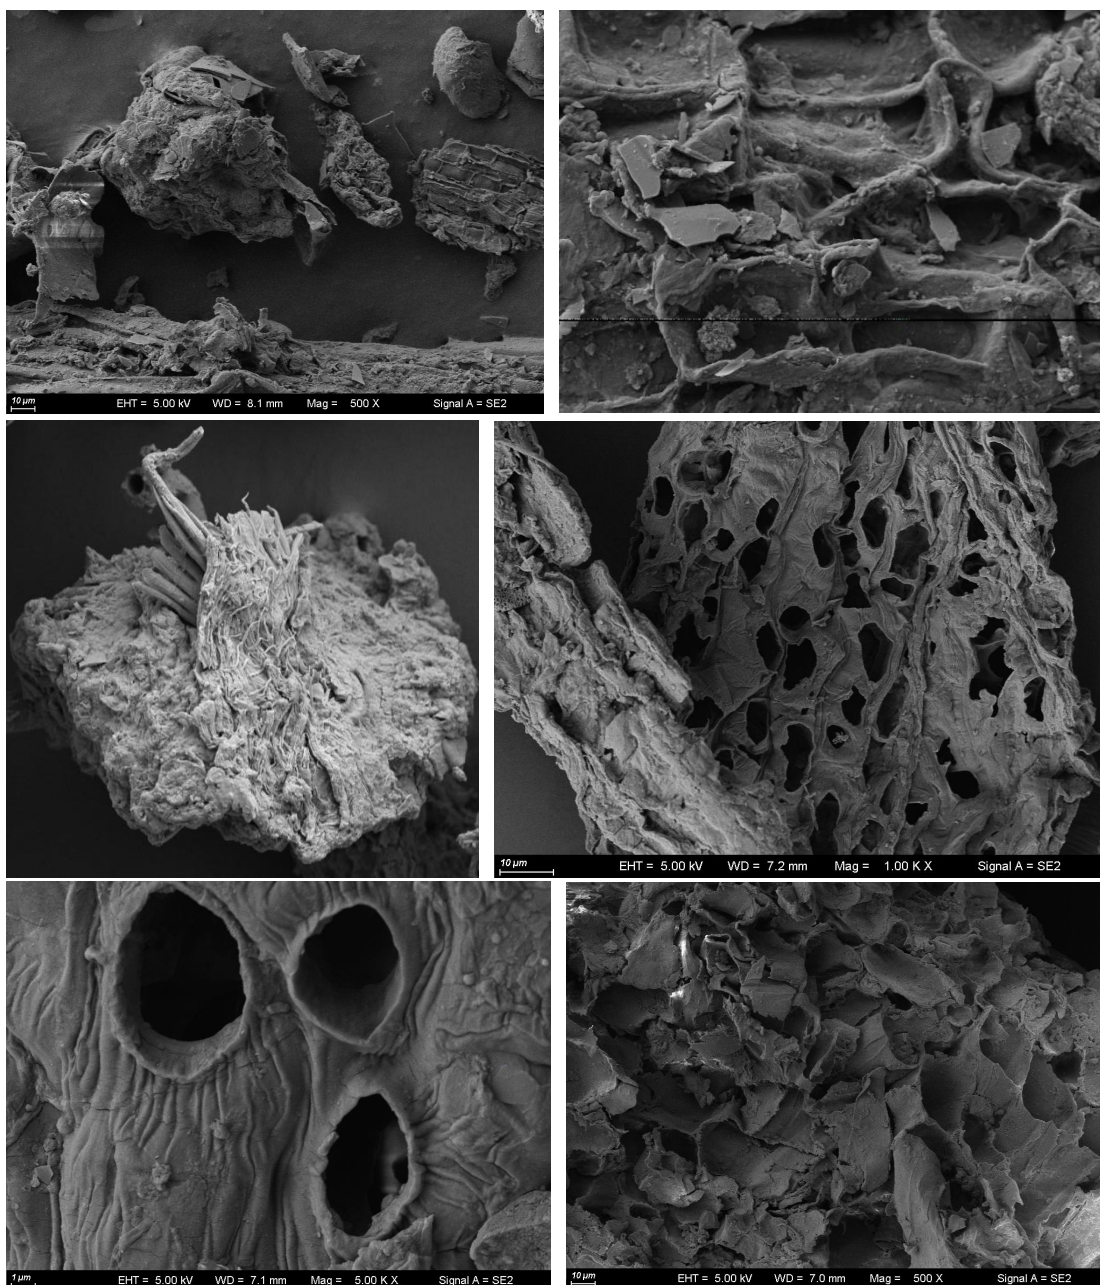

**Figure S2. SEM images of the major materials of compound substrates**

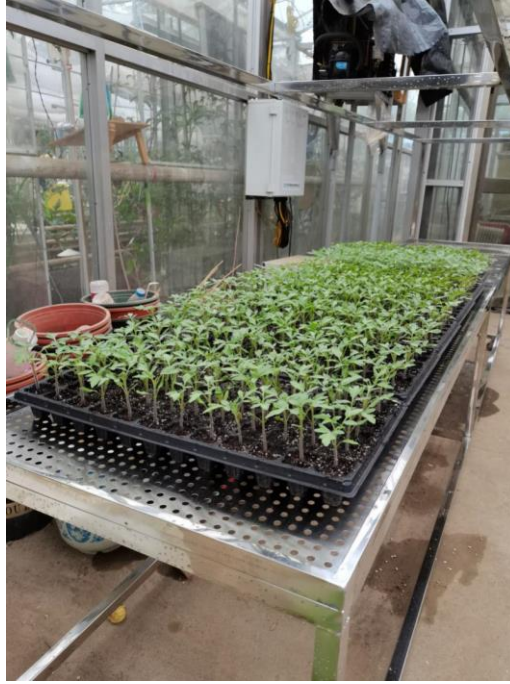

**Figure S3. Tomato seedling raised in different compound substrates**



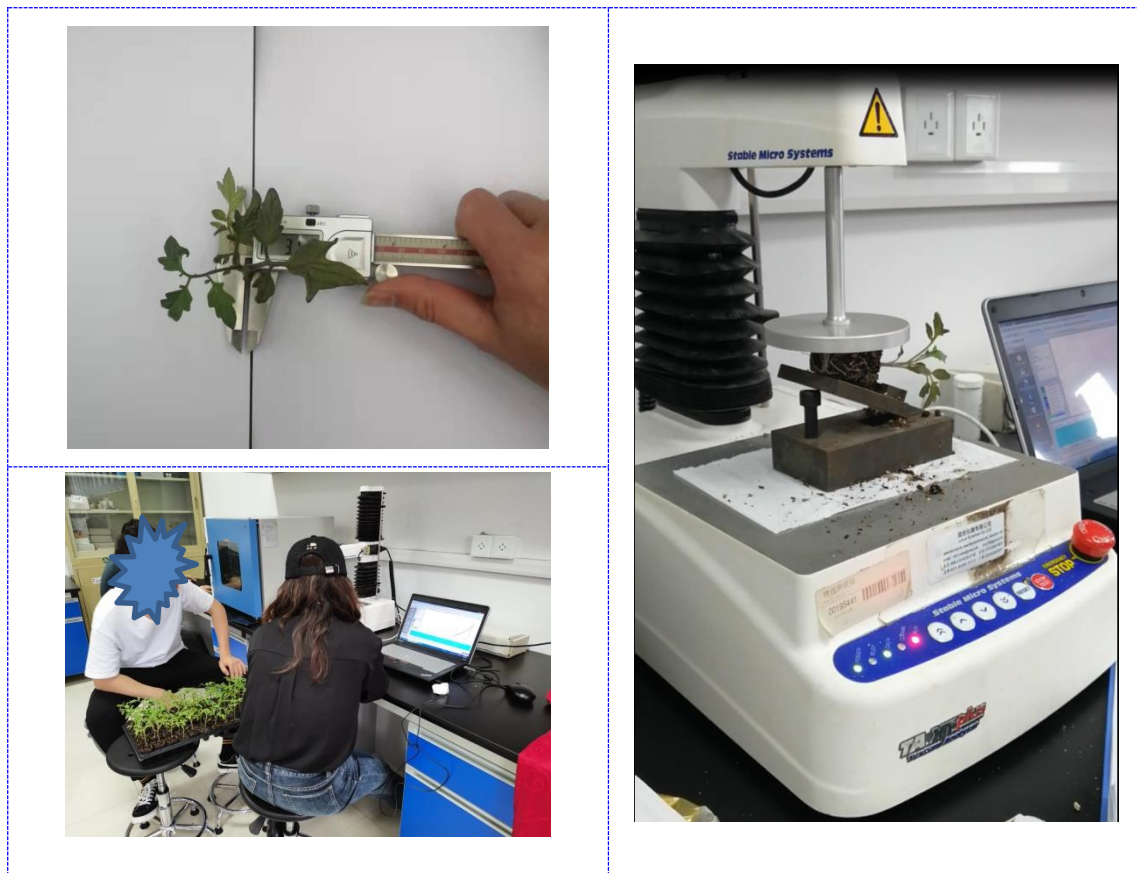

**Figure S4. Testing for the growth and mechanical properties of plug seedlings**

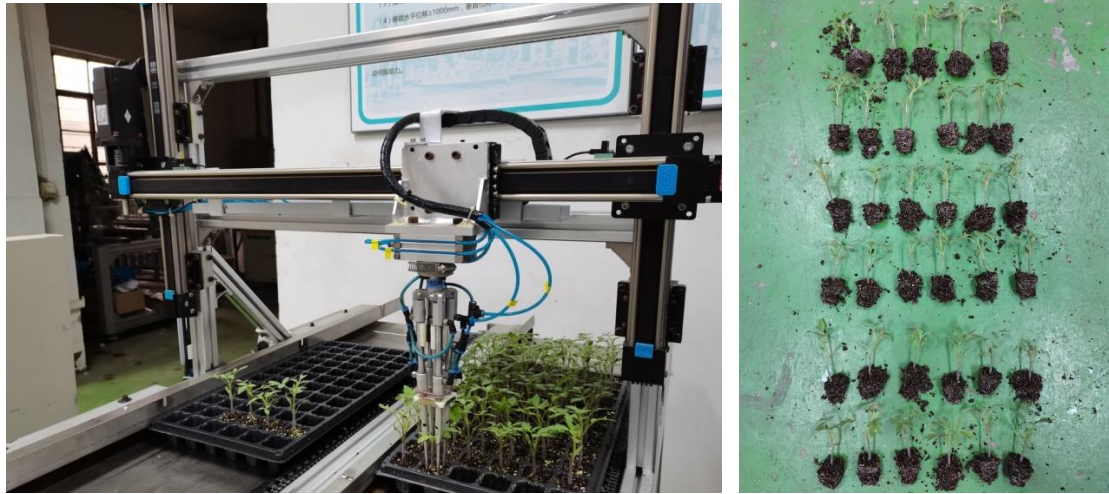

**Figure S5. Automatic transplanting works from the growing trays to the destination trays**
